# Supplementary material for: The Art of Designing DNA Nanostructures with CAD Software
Source: MDPI journal article supplement (doi:10.3390/molecules26082287), 2021-04-15
Supplement: s1 [file s1]

## Supplementary Materials

Table S1: Overview of the software covered in this review as well as their scope, main features and their website. "+" indicates an improvement, "-" a restriction of the software. The websites listed in this table have been last accessed on the 14th of April 2021.

| CAD Software                               | Scope                                              | Main Features                                                                                                                                        | Website                                                            |
|--------------------------------------------|----------------------------------------------------|------------------------------------------------------------------------------------------------------------------------------------------------------|--------------------------------------------------------------------|
| <b>Vienna RNA</b><br>(1994, inactive) [1]  | Secondary structures of RNA strands                | Early tool to predict secondary RNA structures                                                                                                       | -                                                                  |
| <b>Mfold</b><br>(2003, inactive) [2]       | Secondary structures of RNA & DNA strands          | Early tool to predict secondary RNA/DNA structures                                                                                                   | -                                                                  |
| <b>GIDEON</b><br>(2006, inactive) [3]      | <i>de novo</i> design of 3D DNA nanostructures     | GUI for the design of DNA nanostructures<br>Kink & Hairpin relaxation                                                                                | -                                                                  |
| <b>SARSE</b><br>(2008, inactive) [4]       | Lattice-based DNA origami design                   | Semi-automated DNA origami design                                                                                                                    | sourceforge.net/projects/sarse<br>(download, historical reference) |
| <b>UNIQUMER3D</b><br>(2009, inactive) [5]  | <i>de novo</i> design of 3D DNA nanostructures     | 3D modelling tool for DNA constructs                                                                                                                 | -                                                                  |
| <b>Scaffold-based</b>                      |                                                    |                                                                                                                                                      |                                                                    |
| <b>Cadnano 1.0 /2.0</b><br>(2009/2012) [6] | Lattice-based scaffolded DNA origami design        | GUI allowing for design from scratch & manual manipulation of strands<br>Lattice-based (honeycomb or square lattice)<br>+ 2.0 introduces undo button | cadnano.org/legacy<br>cadnano.org<br>(download)                    |
| <b>Cadnano 2.5</b><br>(2018)               |                                                    |                                                                                                                                                      | github.com/cadnano/cadnano2.5<br>(download)                        |
| <b>scadnano</b><br>(2020) [7]              | Lattice-based scaffolded DNA origami design        | Similar to Cadnano<br>script based online tool                                                                                                       | scadnano.org<br>(direct use via browser)                           |
| <b>Tiamat</b><br>(2009) [8]                | Lattice and scaffold free DNA nanostructure design | + No geometrical constraints<br>+ corrects for: secondary structures, repetitions and GC-content<br>- needs manual adjustment                        | yanlab.asu.edu/Resources.html<br>(download)                        |
| <b>vHelix</b><br>(2015) [9]                | Automated 3D wireframe DNA origami design          | Automated 3D wireframe design<br>+ Scaffold automatically transverses through every edge evenly<br>- Restricted to designs equivalent to a sphere    | vhelix.net<br>(download, req. Maya)                                |
| <b>DAEDALUS</b><br>(2016) [10]             | Fully automated 3D wireframe origami design        | Automated 3D wireframe origami design                                                                                                                | daedalus-dna-origami.org<br>(download, req. Maya)                  |

|                                 |                                                                |                                                                                                                                                                                        |                                                 |
|---------------------------------|----------------------------------------------------------------|----------------------------------------------------------------------------------------------------------------------------------------------------------------------------------------|-------------------------------------------------|
|                                 |                                                                | + No geometrical restriction to a sphere<br>+ designs stable at low salt<br>- no GUI                                                                                                   |                                                 |
| <b>PERDIX</b><br>(2019) [11]    | Fully automated 2D wireframe origami design                    | Automated 2D wireframe origami design<br>+ Arbitrary large 2D constructs<br>- no GUI                                                                                                   | perdix-dna-origami.org<br>(download, req. Maya) |
| <b>TALOS</b><br>(2019) [12]     | Fully automated 3D wireframe origami design (higher stability) | Automated 3D wireframe origami design<br>+ Increased mechanical stability due to six-helix edges<br>- Material intensive, requires high salt conc.                                     | talos-dna-origami.org<br>(download, req. Maya)  |
| <b>METIS</b><br>(2019) [13]     | Fully automated 2D wireframe origami design (higher stability) | Automated 2D wireframe origami design<br>+ Increased mechanical stability due to six-helix edges<br>- Material intensive, requires high salt conc.<br>- no GUI                         | metis-dna-origami.org<br>(download, req. Maya)  |
| <b>ATHENA</b><br>(2020) [14]    | Fully automated 2D & 3D wireframe origami design               | Combines all features of DEADALUS, PERDIX, TALOS, METIS in an interactive GUI                                                                                                          | github.com/lcbb/Athena<br>(download, req. Maya) |
| <b>Tile-based</b>               |                                                                |                                                                                                                                                                                        |                                                 |
| <b>DNA Pen</b><br>(2013) [15]   | 2D tile-based DNA designs                                      | Free hand drawn or digitalized 2D design<br>+ Automatic inclusion of poly-T chains to prevent base stacking<br>- only planar structures                                                | guptalab.org/dnapen<br>(download)               |
| <b>3DNA</b><br>(2014) [16]      | 3D tile-based DNA designs                                      | Digitalized 3D design<br>+ Allows for arbitrarily large structures<br>+ Accounts for GC content & Hamming distance                                                                     | guptalab.org/3dna/index.html<br>(download)      |
| <b>Hex-Tiles</b><br>(2019) [17] | 2D Triangulated Wireframe Structures using DNA Tiles           | Triangulated 2D Wireframe Structures without a scaffold<br>+ Allows for arbitrarily large structures<br>+ Rolled up sheets resemble 3D hollow tubes<br>+ physiological salt conditions | github.com/tls-dna/hex-tiles(download)          |

| <i>Analytical tools</i>                                            |                                                                          |                                                                                                                                                                                   |                                                                                                              |
|--------------------------------------------------------------------|--------------------------------------------------------------------------|-----------------------------------------------------------------------------------------------------------------------------------------------------------------------------------|--------------------------------------------------------------------------------------------------------------|
| <b>UNAFold</b><br>(2008) [18]                                      | DNA & RNA folding and hybridization prediction                           | Continuation of Mfold                                                                                                                                                             | www.unafold.org<br>(download)                                                                                |
| <b>NUPACK</b><br>(2010) [19]                                       | DNA folding and hybridization prediction                                 | Suitable for multiple strand analysis                                                                                                                                             | nupack.org<br>(download & direct use via browser)                                                            |
| <b>ViennaRNA Package 2.0</b><br>(2011) n[20]                       | RNA secondary structure prediction                                       | RNA secondary structure prediction                                                                                                                                                | www.tbi.univie.ac.at/RNA/#download<br>(download)                                                             |
| <b>CanDo</b><br>(2011) [21]                                        | 2D & 3D modeling of DNA nanostructures                                   | Finite element modeling framework for DNA origami assemblies<br>input: caDNAno or Tiamat                                                                                          | cando-dna-origami.org<br>(submission via browser)                                                            |
| <b>oxDNA/oxDNA2</b><br>(2015) [22]<br><b>oxView</b><br>(2020) [23] | 2D & 3D Coarse-grained modelling of DNA & RNA assemblies                 | Coarse-grained modelling of DNA/RNA for DNA origami assemblies<br>Includes Monte Carlo and Molecular Dynamics simulations<br>Easy to visualize via browser-based oxView           | dna.physics.ox.ac.uk/index.php<br>(download)<br>sulcgroup.github.io/oxdna-viewer<br>(direct use via browser) |
| <b>TacoxDNA</b><br>(2019) [24]                                     | Web-based interface for converting common formats of DNA structures      | input: XYZ coordinate file, cadnano, Tiamat, CanDo, oxDNA, PDB<br>output: oxDNA, PDB                                                                                              | tacoxdna.sissa.it<br>(direct use via browser)                                                                |
| <b>MrDNA</b><br>(2019) [25]                                        | Fast analysis of DNA nano-structures with high resolution                | Faster prediction of low- & high-resolution models at Near-Atomic Resolution<br>Predicts 3D shape & equilibrium properties<br>input: cadnano, vHelix, DAEDALUS, CanDo, oxDNA, PDB | gitlab.engr.illinois.edu/tbgl/tools/mrdna<br>(download)                                                      |
| <b>Adenita</b><br>(2020) [26]                                      | Universal approach for the design and/or analysis of DNA nano-structures | Combines several previous approaches and also other molecular structures<br>input: cadnano, vHelix, DAEDALUS                                                                      | samson-connect.net/element/dda2a078-1ab6-96ba-0d14-ee1717632d7a.html<br>(download, req. SAMSON)              |
| <b>SNUPI</b><br>(2021) [27]                                        | Rapid analysis of DNA Origami structures with high resolution            | Rapid analysis due to a multiscale analysis framework<br>Predicts 3D shape, equilibrium dynamic                                                                                   | github.com/SSDL-SNU/SNUPI<br>(download)                                                                      |

|  |  |                                                    |  |
|--|--|----------------------------------------------------|--|
|  |  | properties & mechanical rigidity<br>input: cadnano |  |
|--|--|----------------------------------------------------|--|

Table S2: List of used oligonucleotide sequences for AFM imaging shown in figure 9.

|         |                                             |
|---------|---------------------------------------------|
| oligo1  | CAGGCAAAGCGCCATTCGCCATTCAGGCTGCGCAATCCAGCCA |
| oligo2  | GTAACAACCCGTCGGATTCGGCCAGTGCCAAGCTTGCA      |
| oligo3  | AAAAGCCCCAAAAACAGGAGCACCGCTTCTGGTGCCGG      |
| oligo4  | ATCACCATCAATATGATATTCATCAACATTAAATGTGA      |
| oligo5  | CCTCAGAGCATAAAGCTAATATGTACCCCGTTGATAA       |
| oligo6  | TGCGAACGAGTAGATTTAGTGAGAAAGGCCGGAGACAG      |
| oligo7  | AGCAAACCTCCAACAGGTCAATTAGCAAAATTAAGCAAT     |
| oligo8  | TTGAATCCCCCTCAAATGCATATAACAGTTGATTCCCA      |
| oligo9  | ACATAACGCCAAAAGGAATGCTTCAAAGCGAACCAGAC      |
| oligo10 | GTTTAATTTCAACTTTAATTGCGGAATCGTCATAAATA      |
| oligo11 | TTGAAAGAGGACAGATGAATACCACATTCAACTAATGC      |
| oligo12 | GGCAAAAGAATACTACTAAAAGTAGTAAATTGGGCTTGA     |
| oligo13 | GCTTGCAGGGAGTTAAAGGTAAGGGAACCGAACTGACC      |
| oligo14 | CCAGTCACGACGTTGTAAAACGACTCCGTGGG            |
| oligo15 | GGCGATTAAAGTTGGGTAACGCCAGGGGATAGG           |
| oligo16 | ACGCCAGCTGGCGAAAAGGGGATGTCGTAACC            |
| oligo17 | AAGGGCGATCGGTGCGGGCCTCTTGACGACA             |
| oligo18 | AACAAACGTTCTGTAGCCAGCTTCAACCGT              |
| oligo19 | TCACGTTGAACGCCATCAAAAATGAGGGTAG             |
| oligo20 | GTGCATCTTTTGTTAAATCAGCTCGCTATCAG            |
| oligo21 | GTATCGGCGTTAATATTTTGTTAAACAAGA              |
| oligo22 | GCTTCCGAGATTGTATAAGCAAACTAGCAT              |
| oligo23 | GTCTGGCCGCGGATTGACCGTAATGGTTTTT             |
| oligo24 | ACCAATAGGGTGTAGATGGGCGCATGCTGCAA            |
| oligo25 | ATTAAATTGCCAGTTTGAGGGGACCGCTATT             |
| oligo26 | TTGTAAACCTCAGGAAGATCGCACCTGTTGGG            |
| oligo27 | TCTAGCTGTAAAGATTCAAAAGGGTTTGACCA            |
| oligo28 | CTATTTTTTTTAAATGCAATGCCATAACCTG             |
| oligo29 | GTCATTGCGCAAGGATAAAAAATTCGCGAGCT            |
| oligo30 | GAATCGATATACTTTTGCGGGAGAATAGTAG             |
| oligo31 | GTCAATCAATCGGTTGTACCAAAAACAGGCAA            |
| oligo32 | TGTGTAGGATAAATTAATGCCGAAATTCGC              |
| oligo33 | CTCATATATGAGAGATCTACAAAGATTTTTTA            |
| oligo34 | ATTTCAACCTGAGAGTCTGGAGCAAATTCGC             |
| oligo35 | ACCCTGTAGAACGGTAATCGTAAATATTTAAA            |
| oligo36 | TTAGATACCTGGAAGTTTCATTCTTTTAAACA            |
| oligo37 | TTTAGCTATGTTTTAAATATGCAAATCAAAA             |
| oligo38 | GAAAAGGTCTTAATTGCTGAATATATAGTCAG            |
| oligo39 | TAGCATTAATAAGAGGTCATTTTGTATTAAG             |
| oligo40 | GGCAAAGAGGATTAGAGAGTACCTTCGCGTTT            |
| oligo41 | TACGGTGTATTTTCGCAAATGGTCATGAGTAA            |
| oligo42 | AGCTCAACATATTTTCATTTGGGGTTAGAACC            |
| oligo43 | GCTTAGAGGGCATCAATTCTACTAAGCCTTT             |
| oligo44 | TCCTTTTGACATCCAATAAATCATACATTATG            |
| oligo45 | G TTCAGAAGGATAGCGTCCAATACCATTGTGA           |
| oligo46 | ATCAGGTCCAGAGGGGGTAATAGTGGTCAT              |
| oligo47 | AAGCAAAGAATAGCGAGAGGCTTTGAAAAATC            |
| oligo48 | AGGAAGCCCCCTCGTTTACCAGACAACAACA             |
| oligo49 | TAATTGATACGAGGCATAGTAAGAGTTGAGA             |
| oligo50 | TTTAGACTAACGAGAATGACCATAACTAAAG             |

|          |                                         |
|----------|-----------------------------------------|
| oligo51  | AAGTTTGGCTTTACCCTGACTATTAATGCTGT        |
| oligo52  | AAAACCAACGGATTGCATCAAAAAGCGGATG         |
| oligo53  | TATCATAACGAAAGACTTCAAATATTAATTGC        |
| oligo54  | ATTACCTTGAGAAACACCAGAACGACACTCAT        |
| oligo55  | TATACCATGCTCATTCACTGAATAGCGCGAA         |
| oligo56  | TACGTTAAGATATTTCATTACCCAATCATCGCC       |
| oligo57  | TTATTACACCTTCATCAAGAGTAAACCTGCT         |
| oligo58  | TTTAGGAACGGTGTACAGACCAGGCGCAGACG        |
| oligo59  | GCCCTGACATGCGATTTTAAGAACTAAAATG         |
| oligo60  | AACAAAGCGTCAGGACGTTGGGAATGCAAAAG        |
| oligo61  | AAGAACCGTAAAACGAACTAACGGGACGATA         |
| oligo62  | CTGGCTGAGGTAGAAAGATTCATCAGCAACAC        |
| oligo63  | GTAAAAATACCCAGCGATTATACCAAAGGCTT        |
| oligo64  | ACTTTTTCACAAACGGAGATTGTGAATCAACGT       |
| oligo65  | AGCAACGGTGTGTGCGAAATCCGCGTCTTGAC        |
| oligo66  | CAGCAGCGCTTAGCCGGAACGAGGCGCATAGG        |
| oligo67  | AGTTTCGTCACCAGTACAAAACCGATATATTCGGTCGC  |
| oligo68  | CAGGCGGATAAGTGCCGTCAATAGAAAGGAACAATA    |
| oligo69  | TTTGATGATACAGGAGTGTGGAACCCATGTACCGTAAC  |
| oligo70  | CTCAGAGCCACCACCCTCAATTAGCGGGTTTTGCTCA   |
| oligo71  | CACCGTAATCAGTAGCGACTCCAGTAAGCGTCATACAT  |
| oligo72  | ACAAAAGGGCGACATTCAACCGCCACCCTCAGAACCGC  |
| oligo73  | GCAATAATAACGGAATACCACCAATGAAACCATCGATA  |
| oligo74  | ACACCCTGAACAAAGTCAGCATATGGTTTACCAGCGCC  |
| oligo75  | TTACCAACGCTAACGAGCGTACCAGAAGGAAACCGAGG  |
| oligo76  | GTTTTTATTTTCATCGTAGCATTAGACGGGAGAAATTA  |
| oligo77  | CAACATGTTTCAGCTAATGCCAGCTACAATTTTATCCTG |
| oligo78  | TCATATGCGTTATACAAATCACTCATCGAGAACAAGCA  |
| oligo79  | AAAATCTCGTTTCAGCGGAGTGAGGAGAGGGT        |
| oligo80  | CTTTAATTGTATGGGATTTTGCTGTGTATCA         |
| oligo81  | CGAGGTGATCGTCTTTCCAGACGTGCCACCCT        |
| oligo82  | ATAGTTGCCTCATAGTTAGCGTAACACCCTC         |
| oligo83  | CCACGCATACTACAACGCCTGTAGGATAGCAA        |
| oligo84  | TGATATAACAAGAGAAGGATTAGGGAGCCGCC        |
| oligo85  | CCGTACTAACATGAAAGTATTAAGCCAGCAT         |
| oligo86  | CAGAACCGCCCCCTGCCTATTTCGGACGATTG        |
| oligo87  | AGAGCCACTGAGTAACAGTGCCCGATCCTCA         |
| oligo88  | GCCCAATAACTGGTAATAAGTTTTTCTCTGAA        |
| oligo89  | AGACTCCTGTATAGCCCGGAATAGAAACAAC         |
| oligo90  | TATTCTGACAGGAGTTTAGTACCTAGTAAAT         |
| oligo91  | AGTTAATGCCACCCTCAGAACCGCCGATCTA         |
| oligo92  | CAGTGCCTCACCTCATTTTCAGGCATTCCAC         |
| oligo93  | ACCAGAACACCGCCTCCCTCAGAGCCGATTGA        |
| oligo94  | TGACAGGCAAAATCACCGGAACCAAAATTATT        |
| oligo95  | GCCTTGATCCCCTTATTAGCGTTTCACCGACT        |
| oligo96  | TTAAAGCCGCGCGTTTTTCATCGGCGCAAAAT        |
| oligo97  | TTTACCGTAGAATCAAGTTTGCCTCAAGGCCG        |
| oligo98  | CCACCGGACACCACCAGAGCCGCCGAGGCTG         |
| oligo99  | TTCATAATAGGTTGAGGCAGGTCAGAACCTAT        |
| oligo100 | GTCATAGCATTACAAAACAAATAATATAAAC         |
| oligo101 | AGACTGTAAGAATGGAAAGCGCAGAACGGGGT        |
| oligo102 | GGGAGGGACAATCAATAGAAAATTAGGGTAAT        |
| oligo103 | CATTAATAAAGACACCACGGAATCCCACAAG         |
| oligo104 | TGAGCCATTACATAAAGGTGGCAAGAGCAAGA        |
| oligo105 | CACCAGTAACGCAGTATGTTAGCATTACCGA         |
| oligo106 | GAAACGTCCAAAAGAACTGGCATGGATAGCCG        |

|          |                                             |
|----------|---------------------------------------------|
| oligo107 | TTTTGTCAAGGTAAATATTGACGGAGAGCCA             |
| oligo108 | AGAAACGCGGTGAATTATCACCGTGCCATCTT            |
| oligo109 | AAAATACATTGGGAATTAGAGCCAATTTTCG             |
| oligo110 | TCCTTATTGCACCATTACCATTAGTTAGCGTC            |
| oligo111 | TGAGCGCTTAAAAACAGGGAAGCGGAATCATT            |
| oligo112 | AATTGAGGAAAAATAGCAGCCTTTAGATATAG            |
| oligo113 | AACAATGATAAGAAACGATTTTTTACGCGAGG            |
| oligo114 | AGCCCTTTTAAACAGCCATATTATCGGGAGG             |
| oligo115 | AACAAAGTTCTTTCCAGAGCCTAAGTTGCTAT            |
| oligo116 | GAATAACAAATATCAGAGAGATAAAAGTTTA             |
| oligo117 | TCAAAAATTTAAGCCCAATAATAACATATAAA            |
| oligo118 | AATCCAAAAATAGCAATAGCTATCAACGTAG             |
| oligo119 | TTACAAAATTAAGAAAAGTAAGCAATTAAGAC            |
| oligo120 | ACCGCGCCATTAAACCAAGTACCGTCTTACCA            |
| oligo121 | AAGGCTTGCTGTCTTTCCTTATCGGGCTTAA             |
| oligo122 | CGTTTTAGTTTACGAGCATGTAGACGCCAACA            |
| oligo123 | TTTTGAAGCCTGAACAAGAAAAATGAGCCAG             |
| oligo124 | TTTGCACCAGAACGCGCCTGTTACAAAAGGT             |
| oligo125 | GAACGGGTCAATAGCAAGCAAAATCACAGAGA            |
| oligo126 | AATAATCGATCCGGTATTCTAAGAGTTTAACG            |
| oligo127 | CATCCTAACGAACCTCCCGACTTGTTATCCC             |
| oligo128 | AGATAAGTCCTTAAATCAAGATTATTTGCCAG            |
| oligo129 | ATGTGAGTGAATAACCTTGTAAGAAAAAGCCTGTTT        |
| oligo130 | CAATAACGGATTTCGCCTGATTAGGTTGGGTTATATAAC     |
| oligo131 | TCAGATGATGGCAATTCATGGAAACAGTACATAAAATCA     |
| oligo132 | ATTAGAGCCGTCAATAGATAGTACCTTTTACATCGGGA      |
| oligo133 | TATTAACACCGCCTGCAACAATTATCATCATATTCCTG      |
| oligo134 | AAAGGGACATTCTGGCCAATTAGGAGCACTAACAATA       |
| oligo135 | AATAACATCACTTGCCTGATAAAACAGAGGTGAGGCGG      |
| oligo136 | CGTATAACGTGCTTTCCTCCACCAGTCACACGACCAGT      |
| oligo137 | GGAGCCCCGATTTAGAGCGTAGCAATACTTCTTTGAT       |
| oligo138 | TAGCCCCGAGATAGGGTTGATACTATGGTTGCTTTGACG     |
| oligo139 | TTTGCGTATTGGGCGCCAGAGCACTAAATCGGAACCCCT     |
| oligo140 | TTCTTTTCGCTGCATTAATGAATCGGCCAACGCGCGGGGAGAG |
| oligo141 | GAAATTGTTATCCGCTCACAAATCCCTTATAAATCAAA      |
| oligo142 | CTTTGACCCGTAATGCCACTACGATCACGTTG            |
| oligo143 | ACAAAGTATGAGGAAGTTCCATAAAGGAGC              |
| oligo144 | TGATAAATCTACAGAGGCTTTGAGCTTGCTTT            |
| oligo145 | CCATGTTAAAAGACAGCATCGGAAGATACCG             |
| oligo146 | GTCAATCACCGCTTTTGCGGGATCACCATCGC            |
| oligo147 | ATTGCGAATAATAATTTTTAGGCACCAACCTAAAACGA      |
| oligo148 | TTTCAACACAAAAAAAAGGCTCCATAAACGG             |
| oligo149 | GAATTTTCTGTATCGGTTTATCAGGACTAAAG            |
| oligo150 | AAGTTTTGATTCTTAAACAGCTTCGAGGGT              |
| oligo151 | AGACAGCCGCCGACAATGACAACAGTCACCCCT           |
| oligo162 | AATCGTCGAATTACCTTTTTTAATCAATATAA            |
| oligo163 | TCCTTGACAAAATTAATTACATTTGAATAAT             |
| oligo164 | GACGCTGAAAAAGAAGATGATGAACAAAATTA            |
| oligo165 | AAAATCATGAGGCGAATTATTCATAAATTGC             |
| oligo166 | CCTCCGGCTTGCTTTGAATACCAAATGAATAT            |
| oligo167 | TTCAATTTGCTATTAATTAATTTTCGTTAAAT            |
| oligo168 | CAAGAAAAAAACATAGCGATAGCTGTTTGAAA            |
| oligo169 | ACCTGAGCGAAGAGTCAATAGTGAGTTAATT             |
| oligo170 | ATCGCGCAAGGTCTGAGAGACTACGAACGCGA            |
| oligo171 | TCCTGATTCCACCAGAAGGAGCGGAGTGCCAC            |
| oligo172 | GGAAGGGAGTAACATTATCATTTAATCTAAA             |

|          |                                        |
|----------|----------------------------------------|
| oligo173 | TTTGCACGTTTGGCCGAACGTTATTATCAAAC       |
| oligo174 | GTAGATTTTACAAACAATTCGACAGCAAATC        |
| oligo175 | ACAGTAACAATACATTTGAGGATTGTTATCTA       |
| oligo176 | CAAAGAAAAGTTTGGATTATACTTCTAACAAT       |
| oligo177 | AAAGTTTGTTAGAACCTACCATATACAAACAT       |
| oligo178 | TTAAATCCTAAAACAGAAATAAAGTTCAATT        |
| oligo179 | TTAGACTTTCAGGTTTAACGTCAGGTTACAAA       |
| oligo180 | GCTGAGAGAACCACCAGCAGAAGAGTAGAAGA       |
| oligo181 | GCATCACCTTAAAACATCGCCATAATATCCA        |
| oligo182 | CCTCAATCGGCTATTAGTCTTTAAGCAACAGG       |
| oligo183 | AACAGTTGAGAATACGTGGCACAGATTTTGA        |
| oligo184 | AAATATCTCAGAGATAGAACCCTTTTACATT        |
| oligo185 | ACCGAACGCCAGCAGCAAATGAAATGCGGAA        |
| oligo186 | CTGATAGCCTTGCTGAACCTCAAATAATTTTA       |
| oligo187 | TTTTGAATAATATCTGGTCAGTTGACTCGTA        |
| oligo188 | AAAGCGTAAAAGGAATTGAGGAAGTAGAAGTA       |
| oligo189 | ACTCAAACACGCAAATTAACCGTTTGTACGGG       |
| oligo190 | GAACAATTGAGGCCACCGAGTAAAGGAAGGG        |
| oligo191 | AAAAACGCGCCAGAATCCTGAGAATAGGGCGC       |
| oligo192 | CGCTCAATCGATTAAAGGGATTTTGCGTAAC        |
| oligo193 | GGCAGATTGTTAGAATCAGAGCGGGCCGCTAC       |
| oligo194 | TGTCCATCTATCGGCCTTGCTGGTTAAAAAT        |
| oligo195 | ATAATCAGATTACCGCCAGCCATTGCGCGAA        |
| oligo196 | AACGGTACTCATGGAAATACCTACACAATAT        |
| oligo197 | CAGGAGGCCGTCTGAAATGGATTACTGACCTG       |
| oligo198 | GAAAGCCGGGTCGAGGTGCCGTAAGGTGGTTT       |
| oligo199 | AAGAAAGCGTGAAACCATCACCCAACAGCTGA       |
| oligo200 | TGGCAAGTGAAAAACCGTCTATCAAGAGAGTT       |
| oligo201 | CACCACACTTAAAGAACGTGGACTGCCCCAG        |
| oligo202 | AGGGCGCGGTGTTGTTCCAGTTTGGGTTCGA        |
| oligo203 | TTTTTTGGGCGAACGTGGCGAGAAAAGAGTC        |
| oligo204 | GCCCCACTACGAAAGGAGCGGGCGCGTGTTTT       |
| oligo205 | CAAAGGGCGTAGCGGTACGCTGCAGACAGG         |
| oligo206 | GTCCACTACCGCCGCGCTTAATGCGAGCTAAA       |
| oligo207 | TTGCCCTCCGCTTTCAGTCGGGAAACCTG          |
| oligo208 | GCAGCAAGCTAACTCACATTAATTGCGTTGCG       |
| oligo209 | CAGGCGAAAGTGTAAGCCTGGGGTGCTTAA         |
| oligo210 | AATCGGCAAATTCACACAACATACGAGCCGG        |
| oligo211 | TCGTGCCAACCAGTGAGACGGGCAAATCAAG        |
| oligo212 | CTCACTGCTCACCGCCTGGCCCTGGGGCGATG       |
| oligo213 | TGAGTGAGCGGTCCACGCTGGTTTCCAACGT        |
| oligo214 | AAGCATAAAATCCTGTTTGATGGTGAACAAGA       |
| oligo215 | GTATAAAGACACCGGAATCATAATCTTCTGTA       |
| oligo216 | TTGAGAAGTGTGATAAATAAGGCCCTTAGAA        |
| oligo217 | TGTAATTTTGACCTAAATTTAATGTAGATTAA       |
| oligo218 | TAATAAGATTTCAAATATATTTTAATTTATC        |
| oligo219 | AAAGTAATCCAATCGCAAGACAAACTTTTAA        |
| oligo220 | AAGAATAACCAACGCTCAACAGTAATTCCAA        |
| oligo221 | TACCGACCTCGCCATATTTAACAAAACCAATC       |
| oligo222 | TCATCTTCAGGCAGAGGCATTTCAATATCC         |
| oligo223 | GAAAACTTGAATATAAAGTACCGATCAACAAT       |
| oligo224 | TGTAAATGCTGATGCAAATTCTGTCCAGACGACGACAA |

## References:

- [1] Hofacker, I.L.; Fontana, W.; Stadler, P.F.; Bonhoeffer, L.S.; Tacker, M.; Schuster, P. Fast folding and comparison of RNA secondary structures. *Monatsh Chem* **1994**, *125*, 167–188. doi:10.1007/BF00818163.
- [2] Zuker, M. Mfold web server for nucleic acid folding and hybridization prediction. *Nucleic Acids Res.* **2003**, *31*, 3406–3415. doi:10.1093/nar/gkg595.
- [3] Birac, J.J.; Sherman, W.B.; Kopatsch, J.; Constantinou, P.E.; Seeman, N.C. Architecture with GIDEON, a program for design in structural DNA nanotechnology. *J Mol Graph Model* **2006**, *25*, 470–480. doi:10.1016/j.jmgm.2006.03.005.
- [4] Andersen, E.S.; Dong, M.; Nielsen, M.M.; Jahn, K.; Lind-Thomsen, A.; Mamdouh, W.; Gothelf, K.V.; Besenbacher, F.; Kjems, J. DNA Origami Design of Dolphin-Shaped Structures with Flexible Tails. *ACS Nano* **2008**, *2*, 1213–1218. doi:10.1021/nn800215j.
- [5] Zhu, J.; Wei, B.; Yuan, Y.; Mi, Y. UNIQUIMER 3D, a software system for structural DNA nanotechnology design, analysis and evaluation. *Nucleic Acids Res.* **2009**, *37*, 2164–2175. doi:10.1093/nar/gkp005.
- [6] Douglas, S.M.; Marblestone, A.H.; Teerapittayanon, S.; Vazquez, A.; Church, G.M.; Shih, W.M. Rapid prototyping of 3D DNA-origami shapes with caDNAno. *Nucleic Acids Res.* **2009**, *37*, 5001–5006. doi:10.1093/nar/gkp436.
- [7] Doty, D.; Lee, B.L.; Stérin, T. scadnano: A browser-based, scriptable tool for designing DNA nanostructures. *arXiv:2005.11841 [cs,q-bio]* **2020**. arXiv: 2005.11841.
- [8] Williams, S.; Lund, K.; Lin, C.; Wonka, P.; Lindsay, S.; Yan, H. Tiamat: A Three-Dimensional Editing Tool for Complex DNA Structures. DNA Computing; Goel, A.; Simmel, F.C.; Sosík, P., Eds. Springer, **2009**, Lecture Notes in Computer Science, pp. 90–101. event-place: Berlin, Heidelberg, doi:10.1007/978-3-642-03076-5\_8.
- [9] Benson, E.; Mohammed, A.; Gardell, J.; Masich, S.; Czeizler, E.; Orponen, P.; Högberg, B. DNA rendering of polyhedral meshes at the nanoscale. *Nature* **2015**, *523*, 441–444. doi:10.1038/nature14586.
- [10] Veneziano, R.; Ratanalert, S.; Zhang, K.; Zhang, F.; Yan, H.; Chiu, W.; Bathe, M. Designer nanoscale DNA assemblies programmed from the top down. *Science* **2016**, *352*, 1534–1534. doi:10.1126/science.aaf4388.
- [11] Jun, H.; Zhang, F.; Shepherd, T.; Ratanalert, S.; Qi, X.; Yan, H.; Bathe, M. Autonomously designed free-form 2D DNA origami. *Sci. Adv.* **2019**, *5*, eaav0655. doi:10.1126/sciadv.aav0655.
- [12] Jun, H.; Shepherd, T.R.; Zhang, K.; Bricker, W.P.; Li, S.; Chiu, W.; Bathe, M. Automated Sequence Design of 3D Polyhedral Wireframe DNA Origami with Honeycomb Edges. *ACS Nano* **2019**, *13*, 2083–2093. doi:10.1021/acsnano.8b08671.
- [13] Jun, H.; Wang, X.; Bricker, W.P.; Bathe, M. Automated sequence design of 2D wireframe DNA origami with honeycomb edges. *Nat. Commun.* **2019**, *10*, 5419. doi:10.1038/s41467-019-13457-y.
- [14] Jun, H.; Wang, X.; Bricker, W.P.; Jackson, S.; Bathe, M. Rapid Prototyping of Wireframe Scaffolded DNA Origami using ATHENA. *bioRxiv* **2020**, p. 2020.02.09.940320. doi:10.1101/2020.02.09.940320.



- [15] Goyal A, Limbachiya D, Gupta S K, Joshi F, Pritmani S, Sahai A and Gupta M K 2013 DNA Pen: A Tool for Drawing on a Molecular Canvas *arXiv:1306.0369 [cs]*
- [16] Gupta, S.K.; Joshi, F.; Limbachiya, D.; Gupta, M.K. 3DNA: A Tool for DNA Sculpting. *arXiv:1405.4118 [cs]* **2014**. arXiv: 1405.4118.
- [17] Matthies, M.; Agarwal, N.P.; Schmidt, T.L. Design and Synthesis of Triangulated DNA Origami Trusses. *Nano Lett.* **2016**, *16*, 2108–2113. doi:10.1021/acs.nanolett.6b00381.
- [18] Markham, N.R.; Zuker, M. UNAFold: software for nucleic acid folding and hybridization. *Methods Mol. Biol.* **2008**, *453*, 3–31. doi:10.1007/978-1-60327-429-6\_1.
- [19] Zadeh, J.N.; Steenberg, C.D.; Bois, J.S.; Wolfe, B.R.; Pierce, M.B.; Khan, A.R.; Dirks, R.M.; Pierce, N.A. NUPACK: Analysis and design of nucleic acid systems. *J. Comput. Chem* **2011**, *32*, 170–173. doi:https://doi.org/10.1002/jcc.21596.
- [20] Lorenz, R.; Bernhart, S.H.; Höner zu Siederdissen, C.; Tafer, H.; Flamm, C.; Stadler, P.F.; Hofacker, I.L. ViennaRNA Package 2.0. *Algorithms Mol. Biol.* **2011**, *6*, 26. doi:10.1186/1748-7188-6-26.
- [21] Castro, C.E.; Kilchherr, F.; Kim, D.N.; Shiao, E.L.; Wauer, T.; Wortmann, P.; Bathe, M.; Dietz, H. A primer to scaffolded DNA origami. *Nat. Methods* **2011**, *8*, 221–229. doi:10.1038/nmeth.1570.
- [22] Snodin, B.E.K.; Randisi, F.; Mosayebi, M.; Šulc, P.; Schreck, J.S.; Romano, F.; Ouldrige, T.E.; Tsukanov, R.; Nir, E.; Louis, A.A.; Doye, J.P.K. Introducing improved structural properties and salt dependence into a coarse-grained model of DNA. *J. Chem. Phys.* **2015**, *142*, 234901. doi:10.1063/1.4921957.
- [23] Poppleton, E.; Bohlin, J.; Matthies, M.; Sharma, S.; Zhang, F.; Šulc, P. Design, optimization and analysis of large DNA and RNA nanostructures through interactive visualization, editing and molecular simulation. *Nucleic Acids Res.* **2020**, *48*, e72–e72. doi:10.1093/nar/gkaa417.
- [24] Suma, A.; Poppleton, E.; Matthies, M.; Šulc, P.; Romano, F.; Louis, A.A.; Doye, J.P.K.; Micheletti, C.; Rovigatti, L. TacoxDNA: A user-friendly web server for simulations of complex DNA structures, from single strands to origami. *J. Comput. Chem* **2019**, *40*, 2586–2595. doi:https://doi.org/10.1002/jcc.26029.
- [25] Maffeo, C.; Aksimentiev, A. MrDNA: a multi-resolution model for predicting the structure and dynamics of DNA systems. *Nucleic Acids Res.* **2020**, *48*, 5135–5146. doi:10.1093/nar/gkaa200.
- [26] de Llano, E.; Miao, H.; Ahmadi, Y.; Wilson, A.J.; Beeby, M.; Viola, I.; Barisic, I. Adenita: interactive 3D modelling and visualization of DNA nanostructures. *Nucleic Acids Res.* **2020**, *48*, 8269–8275. doi:10.1093/nar/gkaa593.
- [27] Lee, J.Y.; Lee, J.G.; Yun, G.; Lee, C.; Kim, Y.J.; Kim, K.S.; Kim, T.H.; Kim, D.N. Rapid Computational Analysis of DNA Origami Assemblies at Near-Atomic Resolution. *ACS Nano* **2021**, *15*, 1002–1015. doi:10.1021/acsnano.0c07717.
